# Supplementary material for: Architecture and structural dynamics of the heteromeric GluK2/K5 kainate receptor
Source: eLife journal article supplement (doi:10.7554/elife.66097), 2021-03-16
Supplement: supp [file elife-66097-supp-v1.zip]

Archive with 16 entries (16 files):
- elife_poa_e66097_Transparent_Reporting_File.pdf
- elife_poa_e66097_Video_1.mp4
- elife_poa_e66097_Video_2.mp4
- elife_poa_e66097_Video_3.mp4
- elife_poa_e66097_Video_4.mp4
- elife_poa_e66097_Figure_1_figure_supplement_1.pdf
- elife_poa_e66097_Figure_1_figure_supplement_2.pdf
- elife_poa_e66097_Figure_1_figure_supplement_3.pdf
- elife_poa_e66097_Figure_1_figure_supplement_4.pdf
- elife_poa_e66097_Figure_1_figure_supplement_5.pdf
- elife_poa_e66097_Figure_1_figure_supplement_6.pdf
- elife_poa_e66097_Figure_1_figure_supplement_7.pdf
- elife_poa_e66097_Figure_1_figure_supplement_8.pdf
- elife_poa_e66097_Figure_4_figure_supplement_1.pdf
- elife_poa_e66097_Figure_4_figure_supplement_2.pdf
- elife_poa_e66097_Figure_5_figure_supplement_1.pdf
