# Supplementary figures and images for: Architecture and structural dynamics of the heteromeric GluK2/K5 kainate receptor
Source: eLife journal article supplement (doi:10.7554/elife.66097), 2021-03-16

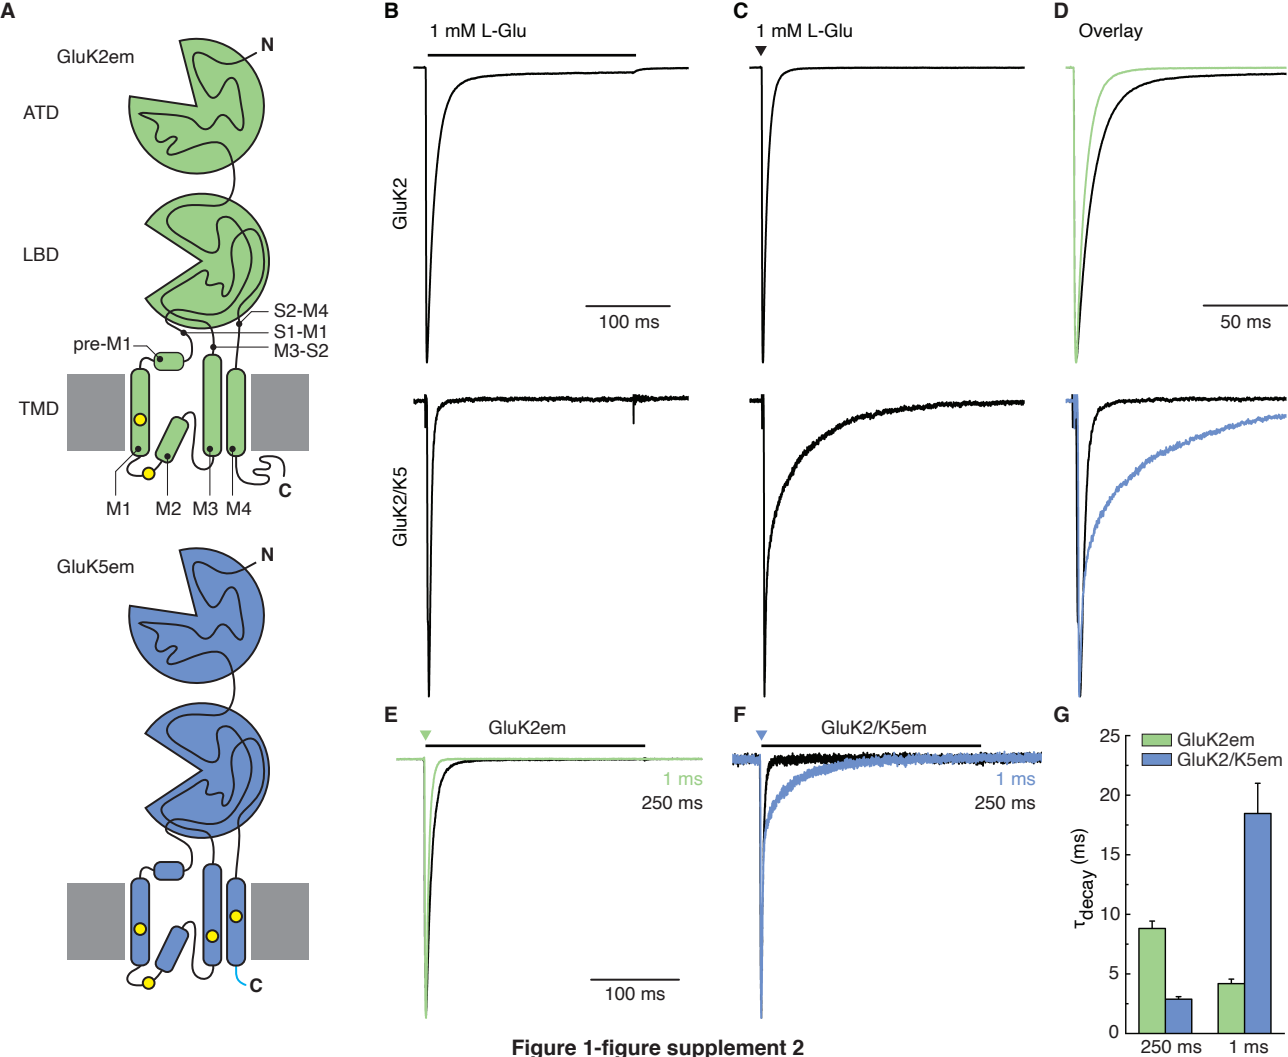

Supplement: supp [file elife-66097-supp-v1.zip]

**A**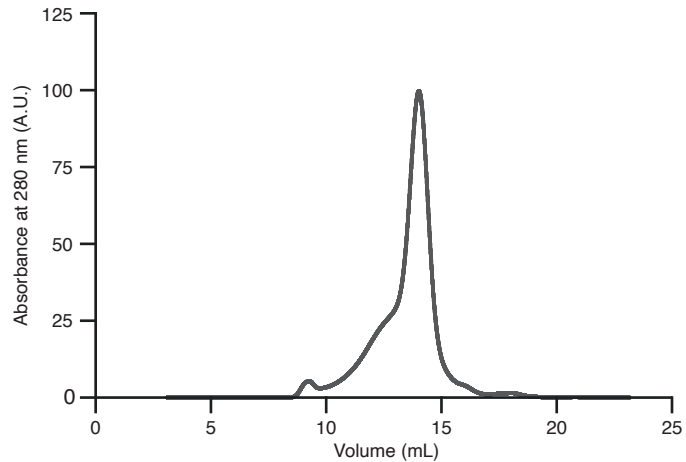**B**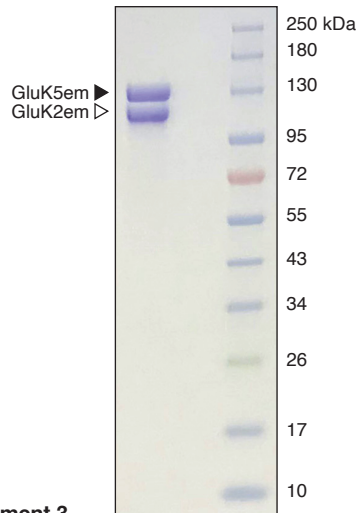

**Figure 1-figure supplement 3**

Supplement: supp [file elife-66097-supp-v1.zip]

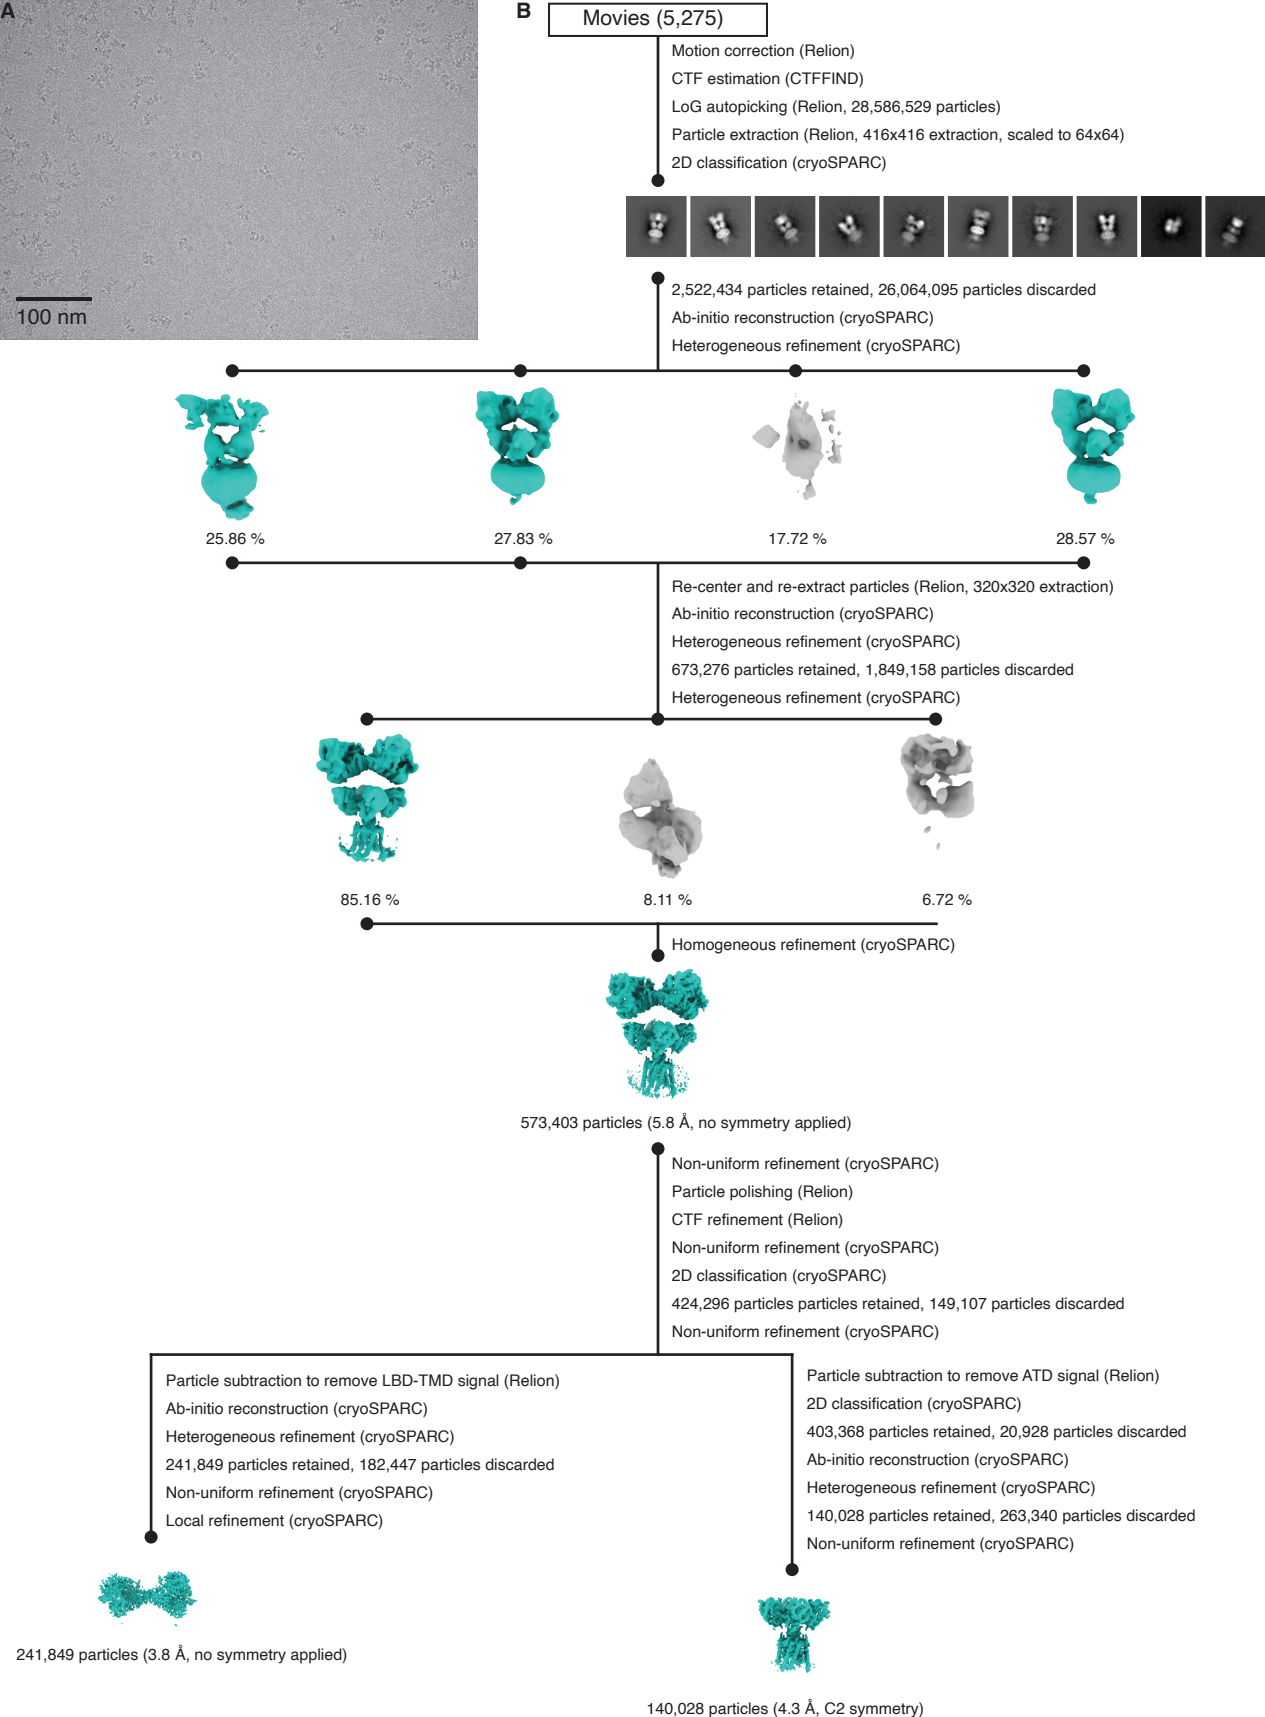

**Figure 4-figure supplement 1**

Supplement: supp [file elife-66097-supp-v1.zip]

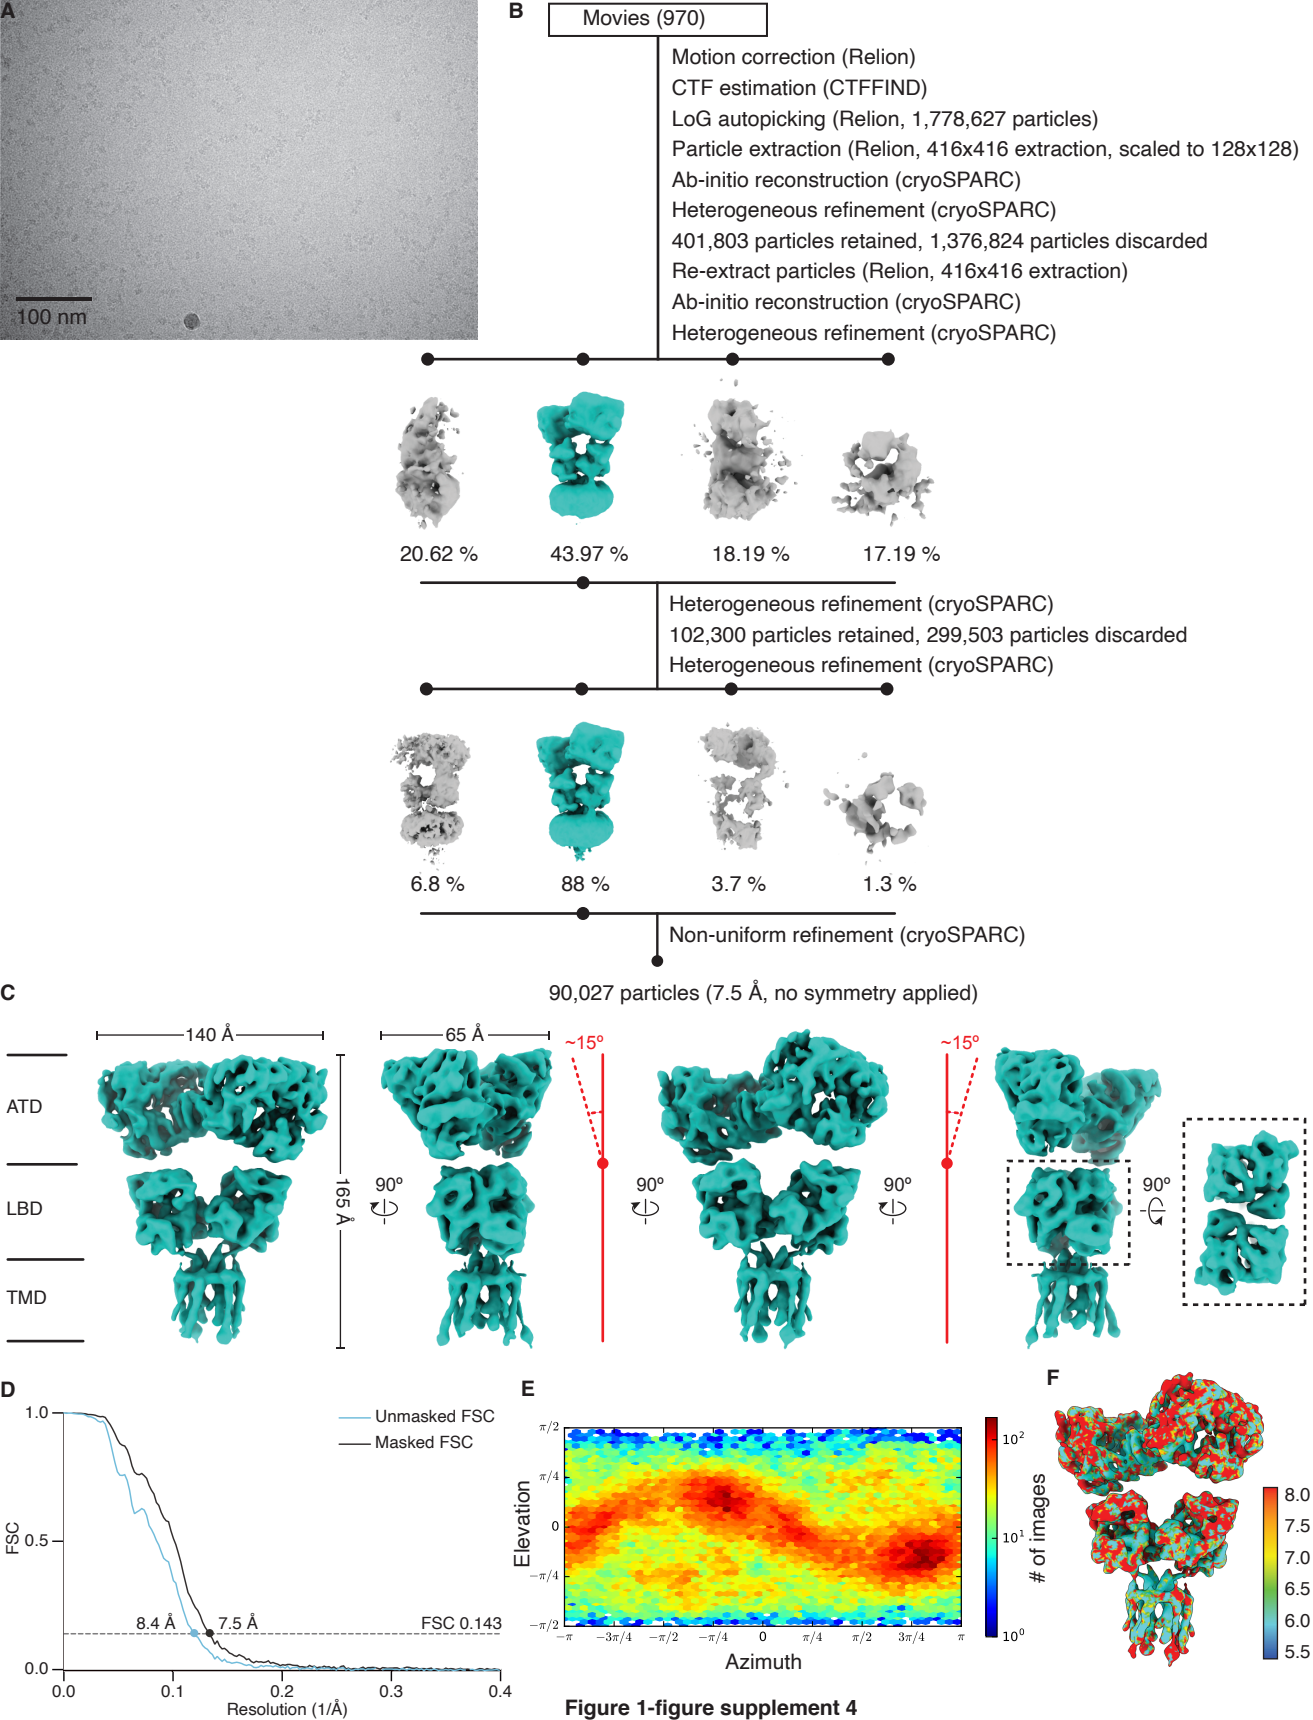

Supplement: supp [file elife-66097-supp-v1.zip › elife_poa_e66097_Figure_1_figure_supplement_4.pdf]

# **GluK2/K5-apo**

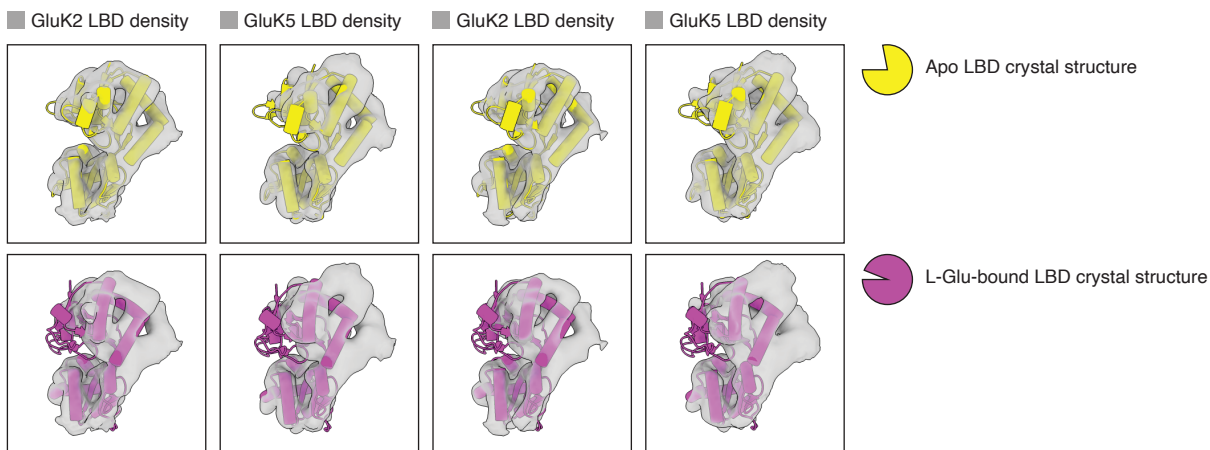

**B**

## **GluK2/K5-CNQX**

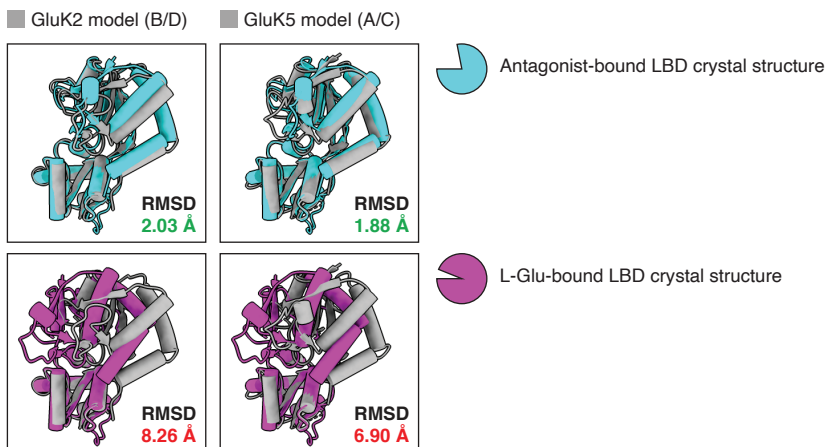

**C**

## **GluK2/K5-L-Glu**

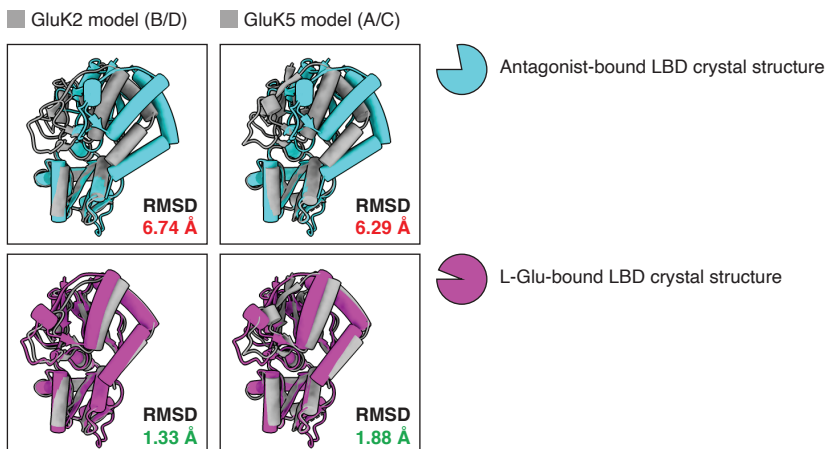

**Figure 1-figure supplement 5**

Supplement: supp [file elife-66097-supp-v1.zip › elife_poa_e66097_Figure_1_figure_supplement_5.pdf]

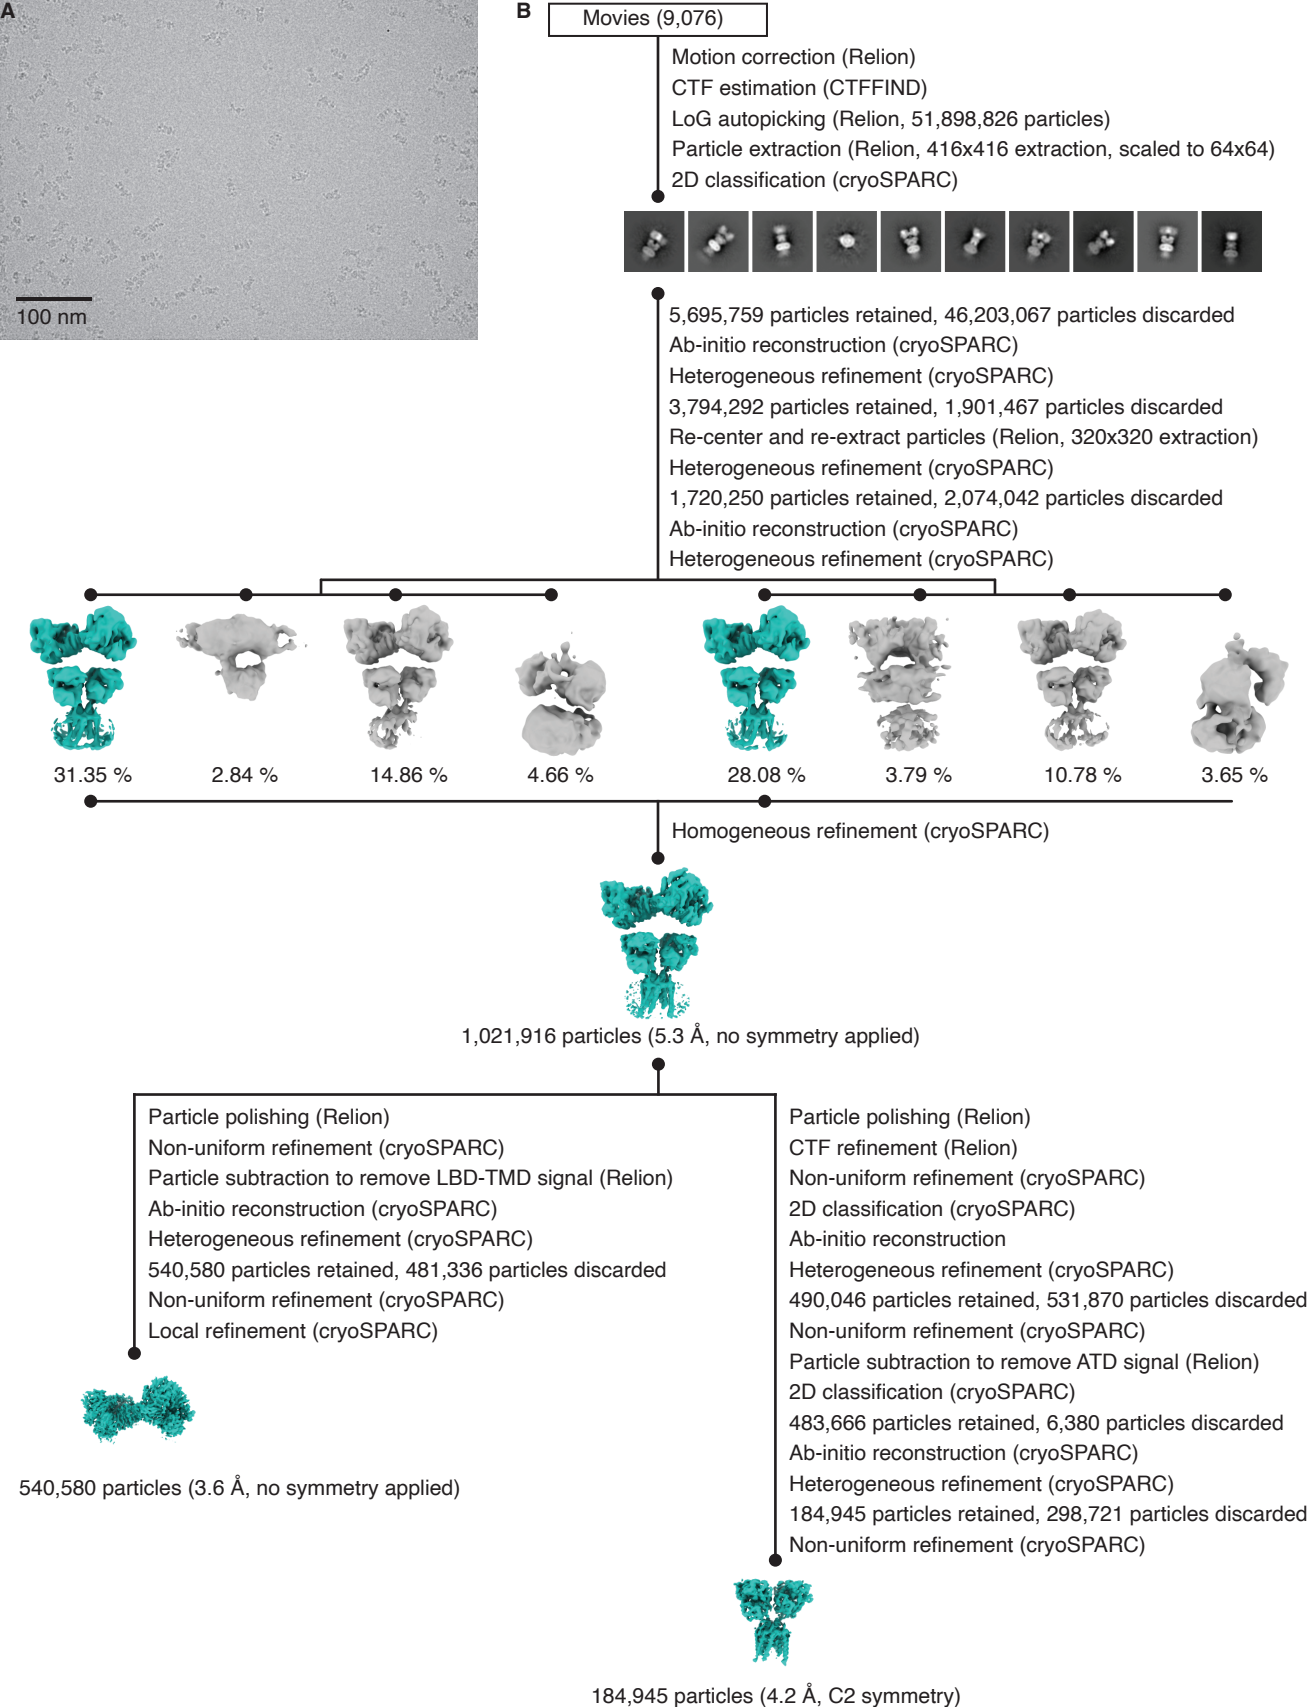

**Figure 1-figure supplement 6**

Supplement: supp [file elife-66097-supp-v1.zip › elife_poa_e66097_Figure_1_figure_supplement_6.pdf]

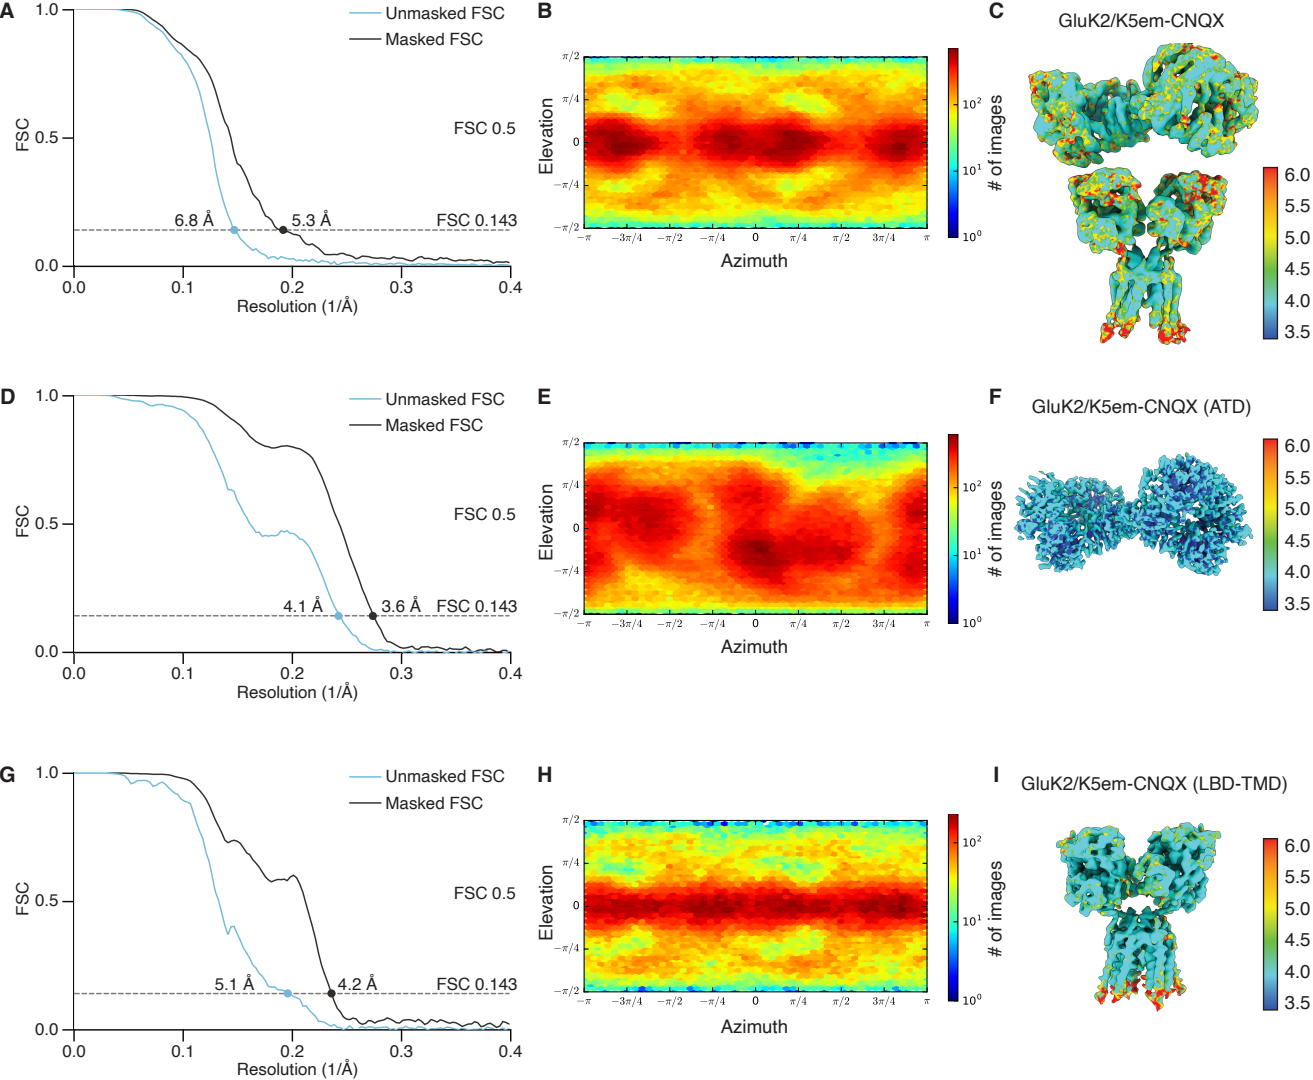

Figure 1-figure supplement 7

Supplement: supp [file elife-66097-supp-v1.zip › elife_poa_e66097_Figure_1_figure_supplement_7.pdf]

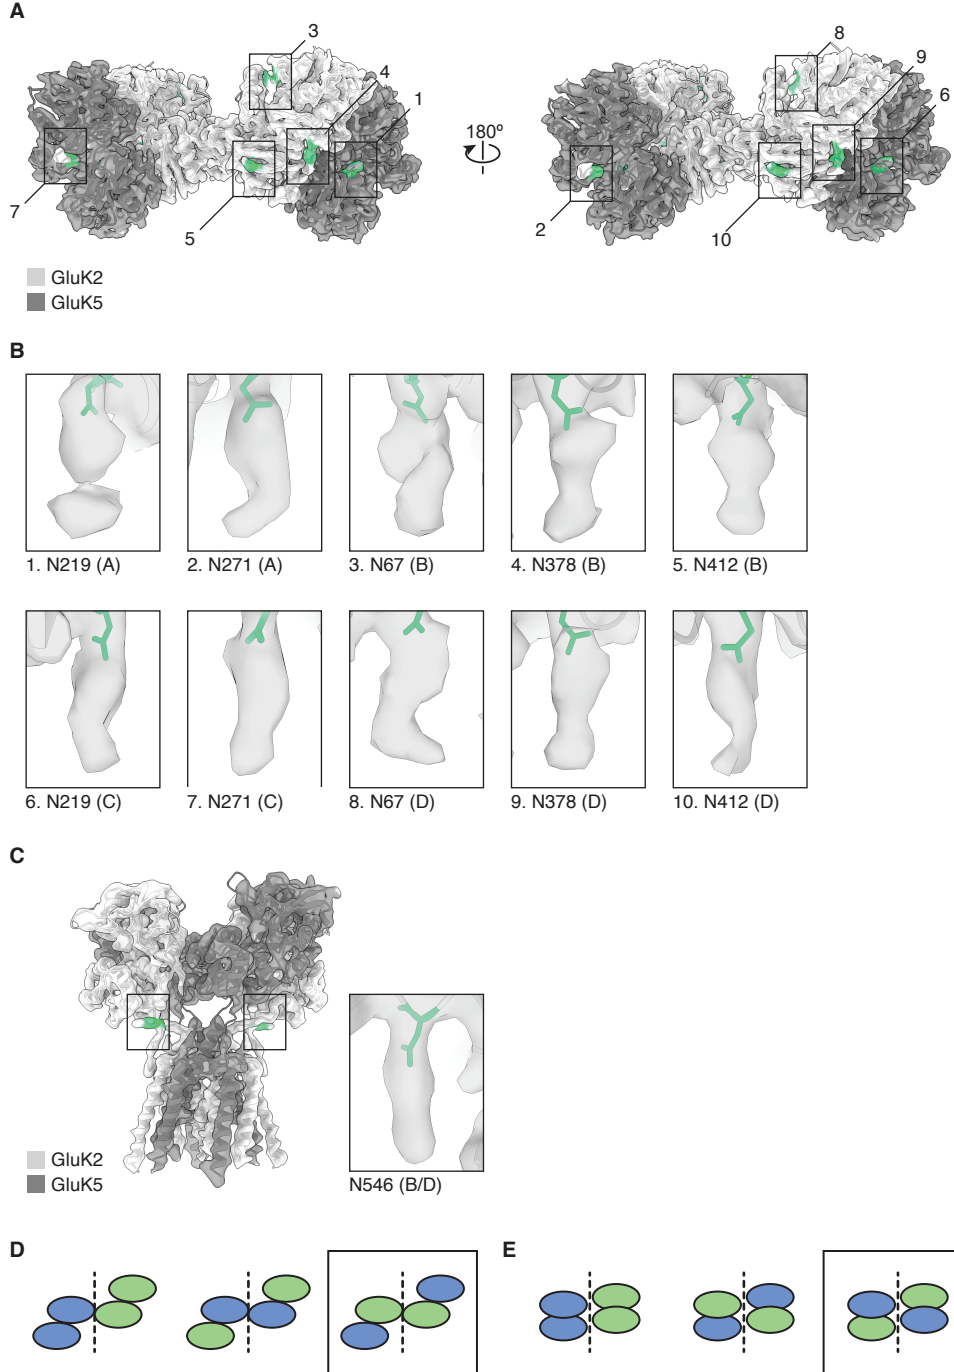

Figure 1-figure supplement 8

Supplement: supp [file elife-66097-supp-v1.zip › elife_poa_e66097_Figure_1_figure_supplement_8.pdf]

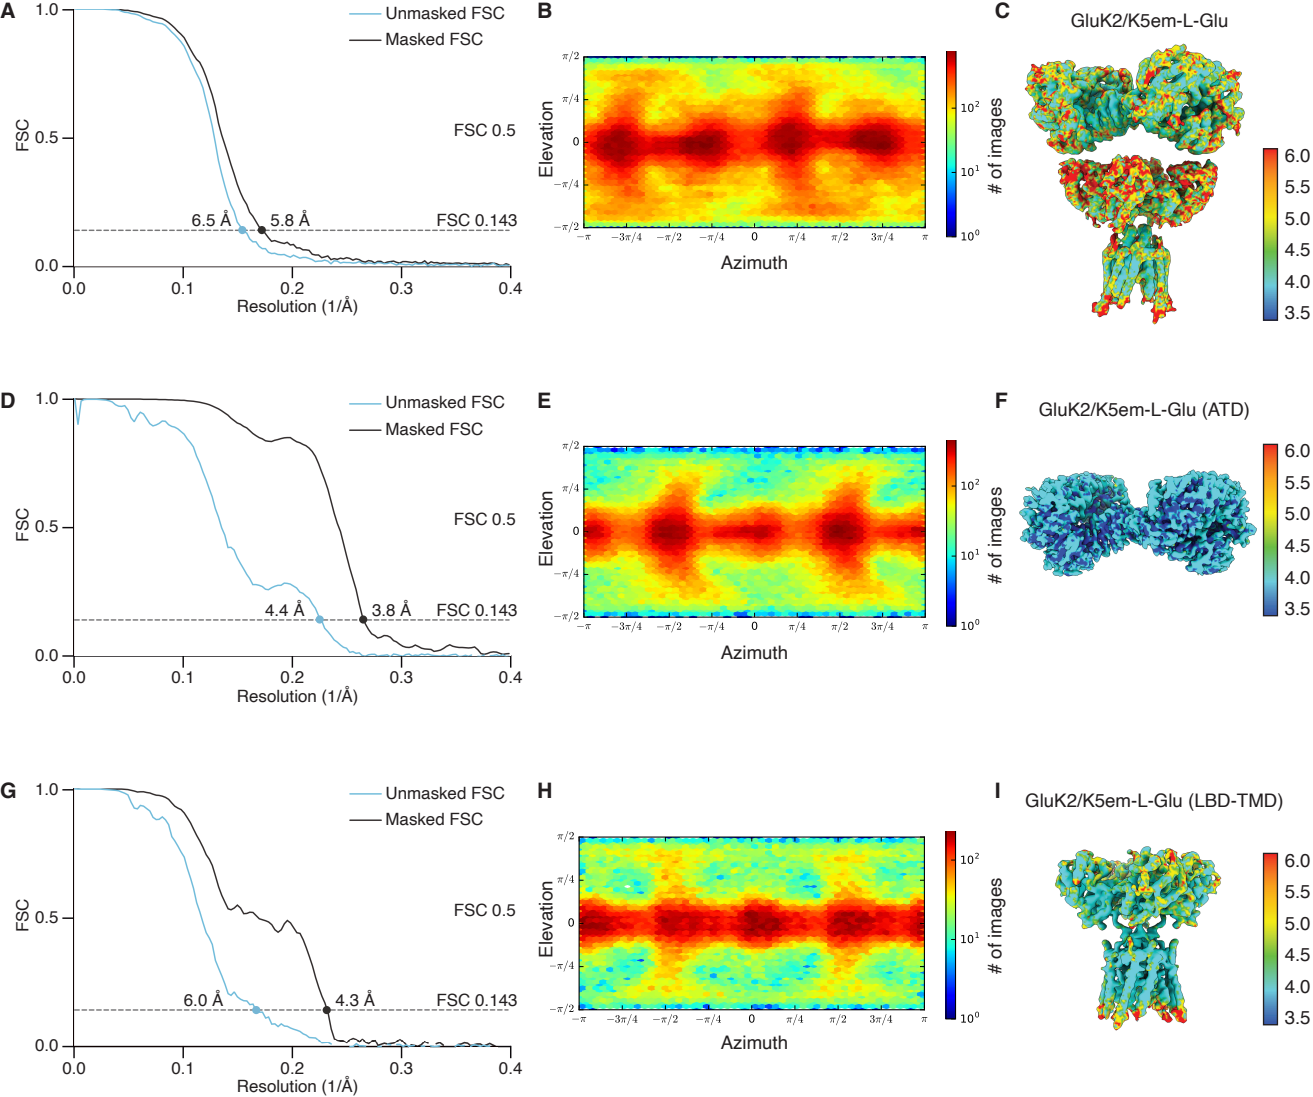

Figure 4-figure supplement 2

Supplement: supp [file elife-66097-supp-v1.zip › elife_poa_e66097_Figure_4_figure_supplement_2.pdf]

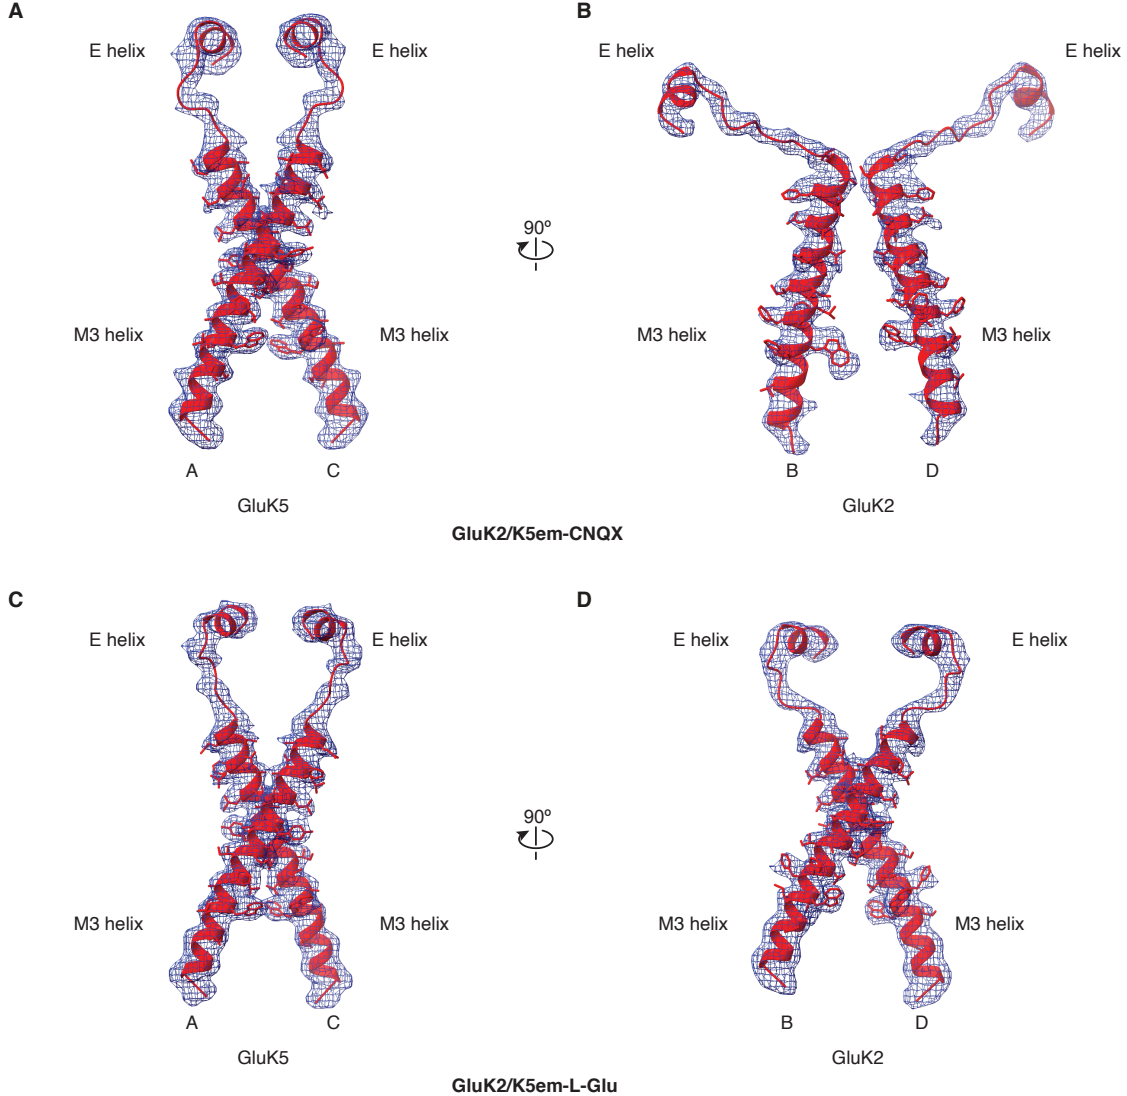

Figure 5-figure supplement 1

Supplement: supp [file elife-66097-supp-v1.zip › elife_poa_e66097_Figure_5_figure_supplement_1.pdf]
